# Supplementary material for: A {Cu2I3−}∞chain hybrid with two-step phase transition, switchable dielectrics, thermochromism and piezochromism
Source: Royal Society of Chemistry journal article supplement (doi:10.1039/d3dt00650f), 2023-01-01
Supplement: d3dt00650f1.pdf [file d3dt00650f1.pdf]

# **A $\{\text{Cu}_2\text{I}_3^-\}_\infty$ chain hybrid with two-step phase transition, switchable dielectrics, reversible thermochromism and irreversible piezochromism**

Qing-Qing Li,<sup>#a</sup> Xue-Wei Pan,<sup>#a</sup> Jin Zhang,<sup>\*a</sup> Lu Zhai,<sup>a</sup> Xiao-Ming Ren<sup>\*a, b, c</sup>

<sup>a</sup> State Key Laboratory of Materials-Oriented Chemical Engineering and College of Chemistry and Molecular Engineering, Nanjing Tech University, Nanjing 211816, P. R. China

<sup>b</sup> College of Materials Science and Engineering, Nanjing Tech University, Nanjing 211816, P. R. China

<sup>c</sup> State Key Laboratory of Coordination Chemistry, Nanjing University, Nanjing 210093, P. R. China

<sup>#</sup> These authors contribute equally to this work

Tel: 86-25-58139476

E-mail: [1084752558@qq.com](mailto:1084752558@qq.com) (JZ)

[xmren@njtech.edu.cn](mailto:xmren@njtech.edu.cn) (XMR)

## Contents

Table S1: Crystallographic data and refinement parameters of **1** at 223, 298, 360 and 400 K

Table S2: Bond lengths (Å) in  $\{\text{Cu}_2\text{I}_3^-\}_\infty$  chain in crystal structures of **1** at 223, 298, 360 and 400 K

Table S3: Bond lengths (Å) in  $\text{C}_5\text{H}_{14}\text{N}^+$  cation in crystal structures of **1** at 223, 298, 360 and 400 K

Table S4: Bond angles ( $^\circ$ ) in  $\{\text{Cu}_2\text{I}_3^-\}_\infty$  chain in crystal structures of **1** at 223, 298, 360 and 400 K

Table S5: Bond angles ( $^\circ$ ) in  $\text{C}_5\text{H}_{14}\text{N}^+$  cation in crystal structures of **1** at 223, 298, 360 and 400 K

Fig. S1: The molecular structure of  $\text{Me}_3\text{EtN}^+$  and  $^1\text{H}$  NMR of  $[\text{Me}_3\text{EtN}]\text{Br}$  (400 MHz,  $\text{D}_2\text{O}$ ): 1.23–1.31 (3H,  $\text{CH}_3$ ), 2.96–3.03 (9H, 3  $\text{CH}_3$ ), 3.26–3.34 (2H,  $\text{CH}_2$ ), 4.96–4.72 ( $\text{D}_2\text{O}$ ).

Fig. S2: Raman spectra of  $[\text{Me}_3\text{EtN}]\text{Br}$  and **1** in the range of (a) 20–3100  $\text{cm}^{-1}$  and (b) 20–1000  $\text{cm}^{-1}$ . IR spectra of  $[\text{Me}_3\text{EtN}]\text{Br}$  and **1** in the range of (c) 4000–500  $\text{cm}^{-1}$  and (d) 1700–500  $\text{cm}^{-1}$ .

Fig. S3: (a) Experimental and simulated PXRD profiles at ambient condition and (b) TG plot of **1**.

Fig. S4: Three different tetrahedral dimers at (a) 223 K, (b) 298 K and (c, d) packing diagrams viewed along *b*- and *c*-axis in the crystal structure of **1** at 223 K.

Fig. S5: (a) ORTEP view of **1** with thermal ellipsoid plot drawn at 20% probability level, (b–c) packing diagrams of **1** viewed along *a*-, *b*- and *c*-axes, respectively, (e)  $\{\text{Cu}_2\text{I}_3^-\}_\infty$  chain in **1** at 360 K.

Fig. S6: (a) ORTEP view of **1** with thermal ellipsoid plot drawn at 20% probability level, (b–c) packing diagrams of **1** viewed along *a*-, *b*- and *c*-axes, respectively, (e)  $\{\text{Cu}_2\text{I}_3^-\}_\infty$  chain in **1** at 400 K.

Fig. S7: Bond order analysis in a dimer of **1** with two face-sharing tetrahedra  $[\text{Cu}_2\text{I}_5]^{3-}$  and two edge-sharing tetrahedra  $[\text{Cu}_2\text{I}_6]^{4-}$  at 223, 298, 360 and 400 K.

Fig. S8: DSC plots of **1**, in which the DSC measurements of **1** were carried out for three heating-cooling cycles (corresponding to the curves 1–3 cycles), and three months later, the DSC measurements were further performed for the same sample again, and the plots of five heating-cooling cycles are presented as the 4–cycle to 8–cycle, and these curves are almost the same as 2-cycle and 3-cycle.

Fig. S9: Photos of crystal of **1** at 303–353 K (almost colorless), 363–463 K (light-yellow), 473–503 K (deeper light-yellow) and 513 K (melted). The pictures were taken by a Leica DMRX polarizing optical microscope equipped with an LINKAM LTS350 cool and hot stage.

Fig. S10: Tauc plots of **1** at 303 and 453 K.

Fig. S11: (a, b) Energy band structures of **1** at 223 K. (c) Local density of states (LDOS), (d) projected density of states (PDOS) and (e) Brillouin zone in **1** at 223 K.

Fig. S12: (a, b) Energy band structures of **1** at 298 K. (c) Local density of states (LDOS), (d) projected density of states (PDOS) and (e) Brillouin zone in **1** at 298 K.

Fig. S13: (a, b) Energy band structures of **1** at 360 K. (c) Local density of states (LDOS), (d) projected density of states (PDOS) and (e) Brillouin zone in **1** at 360 K.

Fig. S14: (a, b) Energy band structures of **1** at 400 K. (c) Local density of states (LDOS), (d) projected density of states (PDOS) and (e) Brillouin zone in **1** at 400 K.

Fig. S14: Tauc plots of **1** transformed from solid diffuse UV-visible spectra under different pressures at room temperature.

Fig. S15: PXRD patterns of **1** in which the samples were treated at different conditions in different  $2\theta$  regimes.

Fig. S16: EPR spectra of **1** where the samples were treated under different pressures recorded at room temperature.

Fig. S17: Variable-temperature PXRD patterns of **1** in different  $2\theta$  ranges at 303 K (pristine sample), 423 and 493 K, 303 K (heated and cooled down).

Table S1: Crystallographic data and refinement parameters of **1** at 223, 298, 360 and 400 K

| Temp. / K                         | 223                                                            | 298                                                            |
|-----------------------------------|----------------------------------------------------------------|----------------------------------------------------------------|
| Chemical formula                  | C <sub>5</sub> H <sub>14</sub> NCu <sub>2</sub> I <sub>3</sub> | C <sub>5</sub> H <sub>14</sub> NCu <sub>2</sub> I <sub>3</sub> |
| CCDC number                       | 2216272                                                        | 2216273                                                        |
| Formula weight                    | 595.95                                                         | 595.95                                                         |
| Crystal system                    | Triclinic                                                      | Triclinic                                                      |
| Space group                       | <i>P</i> -1                                                    | <i>P</i> -1                                                    |
| a / Å                             | 8.2892(3)                                                      | 8.3083(6)                                                      |
| b / Å                             | 9.5653(3)                                                      | 9.6704(7)                                                      |
| c / Å                             | 9.7954(3)                                                      | 9.9142(6)                                                      |
| α / °                             | 61.1868(9)                                                     | 60.925(2)                                                      |
| β / °                             | 83.7127(11)                                                    | 83.001(2)                                                      |
| γ / °                             | 85.3326(11)                                                    | 85.120(2)                                                      |
| V (Å <sup>3</sup> ) / Z           | 676.05(4)                                                      | 690.68(8)                                                      |
| Calc.density g/cm                 | 7.478                                                          | 2.866                                                          |
| Abs.coeff. μ/mms                  | 26.800                                                         | 9.740                                                          |
| F(000)                            | 1344                                                           | 536                                                            |
| θ range for data collection /°    | 2.47 to 26.39                                                  | 2.36 to 24.99                                                  |
| Index range                       | -10 ≤ h ≤ 10<br>-9 ≤ k ≤ 11<br>0 ≤ l ≤ 12s                     | -9 ≤ h ≤ 9<br>-11 ≤ k ≤ 11<br>-11 ≤ l ≤ 11                     |
| Refl. collected/unique            | 2725/2725                                                      | 14013/2428                                                     |
| R <sub>int</sub>                  | 0.0365                                                         | 0.0770                                                         |
| Goodness-of-fit on F <sup>2</sup> | 1.069                                                          | 1.088                                                          |
| Final R indices [I > 2σ(I)]       | R <sub>1</sub> = 0.0467<br>wR <sub>2</sub> = 0.1147            | R <sub>1</sub> = 0.0792<br>wR <sub>2</sub> = 0.2173            |
| R indices(all data)               | R <sub>1</sub> = 0.0603<br>wR <sub>2</sub> = 0.1271            | R <sub>1</sub> = 0.0842<br>wR <sub>2</sub> = 0.2238            |
| Residual(e Å <sup>-3</sup> )      | 1.384/-1.610                                                   | 1.560/-2.432                                                   |

## Continue to Table 1

| Temp. / K                         | 360                                                            | 400                                                            |
|-----------------------------------|----------------------------------------------------------------|----------------------------------------------------------------|
| Chemical formula                  | C <sub>5</sub> H <sub>14</sub> NCu <sub>2</sub> I <sub>3</sub> | C <sub>5</sub> H <sub>14</sub> NCu <sub>2</sub> I <sub>3</sub> |
| CCDC number                       | 2216274                                                        | 2216275                                                        |
| Formula weight                    | 595.95                                                         | 595.95                                                         |
| Crystal system                    | Monoclinic                                                     | Monoclinic                                                     |
| Space group                       | <i>P21/n</i>                                                   | <i>P21/n</i>                                                   |
| a / Å                             | 8.3123(6)                                                      | 8.3199(8)                                                      |
| b / Å                             | 17.2607(14)                                                    | 17.3332(17)                                                    |
| c / Å                             | 9.8344(8)                                                      | 9.8770(10)                                                     |
| α / °                             | 90                                                             | 90.00                                                          |
| β / °                             | 94.641(2)                                                      | 94.569(3)                                                      |
| γ / °                             | 90                                                             | 90.00                                                          |
| V (Å <sup>3</sup> ) / Z           | 1406.37(19)                                                    | 1419.8(2)                                                      |
| Calc.density g/cm                 | 2.815                                                          | 2.788                                                          |
| Abs.coeff. μ/mms                  | 9.567                                                          | 9.476                                                          |
| F(000)                            | 1072                                                           | 1072                                                           |
| θ range for data collection /°    | 2.73 to 26.37                                                  | 2.72 to 26.44                                                  |
| Index range                       | -9 ≤ h ≤ 10<br>-20 ≤ k ≤ 21<br>-12 ≤ l ≤ 12                    | -9 ≤ h ≤ 10<br>-20 ≤ k ≤ 21<br>-12 ≤ l ≤ 12                    |
| Refl. collected/unique            | 10245/2855                                                     | 11647/2893                                                     |
| R <sub>int</sub>                  | 0.0395                                                         | 0.0355                                                         |
| Goodness-of-fit on F <sup>2</sup> | 1.063                                                          | 1.055                                                          |
| Final R indices [I > 2σ(I)]       | R <sub>1</sub> = 0.0586<br>wR <sub>2</sub> = 0.1535            | R <sub>1</sub> = 0.0543<br>wR <sub>2</sub> = 0.1435            |
| R indices(all data)               | R <sub>1</sub> = 0.0911<br>wR <sub>2</sub> = 0.1779            | R <sub>1</sub> = 0.0892<br>wR <sub>2</sub> = 0.1700            |
| Residual(e Å <sup>-3</sup> )      | 1.870/-0.872                                                   | 1.395/-0.745                                                   |

Table S2: Bond lengths (Å) in  $\{\text{Cu}_2\text{I}_3^-\}_\infty$  chain in crystal structures of **1** at 223, 298, 360 and 400 K

| T = 223 K                 |              | T = 298 K                 |              |
|---------------------------|--------------|---------------------------|--------------|
| Atom pair                 | Distance / Å | Atom pair                 | Distance / Å |
| Cu(1)-I(3)                | 2.535(2)     | I(1)-Cu(2)                | 2.533(2)     |
| Cu(1)-I(2)                | 2.645(2)     | I(1)-Cu(1) <sup>#1</sup>  | 2.781(3)     |
| Cu(1)-Cu(1) <sup>#1</sup> | 2.651(4)     | I(1)-Cu(2) <sup>#1</sup>  | 2.847(3)     |
| Cu(1)-I(1)                | 2.744(2)     | I(3)-Cu(1)                | 2.532(2)     |
| Cu(1)-I(3) <sup>#1</sup>  | 2.842(2)     | I(3)-Cu(2) <sup>#2</sup>  | 2.763(3)     |
| Cu(2)-I(1) <sup>#2</sup>  | 2.531(2)     | I(3)-Cu(1) <sup>#2</sup>  | 2.875(3)     |
| Cu(2)-I(2)                | 2.639(2)     | I(2)-Cu(1)                | 2.636(3)     |
| Cu(2)-Cu(2) <sup>#2</sup> | 2.642(4)     | I(2)-Cu(2)                | 2.644(3)     |
| Cu(1)-Cu(2)               | 2.472(4)     | Cu(2)-Cu(1)               | 2.464(3)     |
| Cu(2)-I(3) <sup>#1</sup>  | 2.767(2)     | Cu(2)-Cu(2) <sup>#1</sup> | 2.674(6)     |
| Cu(2)-I(1)                | 2.871(2)     | Cu(2)-I(3) <sup>#2</sup>  | 2.763(3)     |
| I(1)-Cu(2) <sup>#2</sup>  | 2.531(2)     | Cu(2)-I(1) <sup>#1</sup>  | 2.847(3)     |
| I(3)-Cu(2) <sup>#1</sup>  | 2.767(2)     | Cu(1)-Cu(1) <sup>#2</sup> | 2.663(6)     |
| I(3)-Cu(1) <sup>#1</sup>  | 2.842(2)     | Cu(1)-I(1) <sup>#1</sup>  | 2.781(3)     |
|                           |              | Cu(1)-I(3) <sup>#2</sup>  | 2.875(3)     |

Symmetry codes:

T = 223 K: #1 = -x+2, -y, -z+1, #2 = -x+1, -y, -z+1

T = 298 K: #1 = -x+2, -y+1, -z+2; #2 = -x+1, -y+1, -z+2

Continue to Table 2

| T = 360 K                 |              | T = 400 K                 |              |
|---------------------------|--------------|---------------------------|--------------|
| Atom pair                 | Distance / Å | Atom pair                 | Distance / Å |
| Cu(1)-I(3)                | 2.524(2)     | I(3)-Cu(1)                | 2.523(2)     |
| Cu(1)-I(2)                | 2.634(3)     | I(3)-Cu(2)                | 2.809(3)     |
| Cu(1)-Cu(1) <sup>#1</sup> | 2.684(5)     | I(3)-Cu(1) <sup>#1</sup>  | 2.864(3)     |
| Cu(1)-I(1)                | 2.802(3)     | I(2)-Cu(2)                | 2.628(2)     |
| Cu(1)-I(3) <sup>#1</sup>  | 2.873(3)     | I(2)-Cu(1) <sup>#1</sup>  | 2.637(2)     |
| Cu(2)-I(1) <sup>#2</sup>  | 2.526(2)     | I(1)-Cu(2)                | 2.522(2)     |
| Cu(2)-I(2)                | 2.640(2)     | I(1)-Cu(1) <sup>#2</sup>  | 2.800(3)     |
| Cu(2)-Cu(2) <sup>#2</sup> | 2.691(5)     | I(1)-Cu(2) <sup>#3</sup>  | 2.877(3)     |
| Cu(1)-Cu(2)               | 2.464(5)     | Cu(2)-Cu(1) <sup>#1</sup> | 2.461(3)     |
| Cu(2)-I(3) <sup>#1</sup>  | 2.794(3)     | Cu(2)-Cu(2) <sup>#3</sup> | 2.701(5)     |
| Cu(2)-I(1)                | 2.856(3)     | Cu(2)-I(1) <sup>#3</sup>  | 2.877(3)     |
| I(1)-Cu(2) <sup>#2</sup>  | 2.526(2)     | Cu(1)-Cu(2) <sup>#1</sup> | 2.461(3)     |
| I(3)-Cu(2) <sup>#1</sup>  | 2.794(3)     | Cu(1)-I(2) <sup>#1</sup>  | 2.637(2)     |
| I(3)-Cu(1) <sup>#1</sup>  | 2.873(3)     | Cu(1)-Cu(1) <sup>#1</sup> | 2.704(5)     |
|                           |              | Cu(1)-I(1) <sup>#4</sup>  | 2.800(3)     |
|                           |              | Cu(1)-I(3) <sup>#1</sup>  | 2.864(3)     |

Symmetry codes:

T = 360 K: #1 = -x+1, -y+1, -z+1; #2 = -x+2, -y+1, -z+1

T = 400 K: #1 = -x+2, -y+1, -z+1; #2 = x-1, y, z; #3 = -x+1, -y+1, -z+1; #4 = x+1, y, z

Table S3: Bond lengths (Å) in C<sub>5</sub>H<sub>14</sub>N<sup>+</sup> cation in crystal structures of **1** at 223, 298, 360 and 400 K

| T = 223 K |              | T = 298 K |              |
|-----------|--------------|-----------|--------------|
| Atom pair | Distance / Å | Atom pair | Distance / Å |
| N(1)-C(4) | 1.36(2)      | N(1)-C(5) | 1.424(18)    |
| N(1)-C(3) | 1.462(19)    | N(1)-C(1) | 1.423(17)    |
| N(1)-C(1) | 1.496(17)    | N(1)-C(2) | 1.421(17)    |
| N(1)-C(2) | 1.62(3)      | N(1)-C(3) | 1.454(17)    |
| C(5)-C(4) | 1.69(4)      | C(5)-C(4) | 1.488(17)    |

Symmetry codes:

T = 223 K: #1 = -x+2, -y, -z+1; #2 = -x+1, -y, -z+1

T = 298 K: #1 = -x+2, -y+1, -z+2; #2 = -x+1, -y+1, -z+2

Continue to Table 3

| T = 360 K |              | T = 400 K |              |
|-----------|--------------|-----------|--------------|
| Atom pair | Distance / Å | Atom pair | Distance / Å |
| N(1)-C(3) | 1.408(18)    | N(1)-C(3) | 1.403(17)    |
| N(1)-C(1) | 1.432(18)    | N(1)-C(5) | 1.457(17)    |
| N(1)-C(4) | 1.441(18)    | N(1)-C(1) | 1.429(17)    |
| N(1)-C(2) | 1.468(18)    | N(1)-C(2) | 1.450(17)    |
| C(4)-C(5) | 1.581(10)    | C(4)-C(5) | 1.458(18)    |

Symmetry codes:

T = 360 K: #1 = -x+1, -y+1, -z+1; #2 = -x+2, -y+1, -z+1

T = 400 K: #1 = -x+2, -y+1, -z+1; #2 = x-1, y, z

Table S4: Bond angles (°) in  $\{\text{Cu}_2\text{I}_3\}^\infty$  chain in crystal structures of **1** at 223, 298, 360 and 400 K

| T = 223 K                                     |            | T = 298 K                                     |            |
|-----------------------------------------------|------------|-----------------------------------------------|------------|
| Atoms                                         | Angle / °  | Atoms                                         | Angle / °  |
| I(3)-Cu(1)-I(2)                               | 115.91(7)  | Cu(2)-I(1)-Cu(1) <sup>#1</sup>                | 111.19(9)  |
| I(3)-Cu(1)-Cu(1) <sup>#1</sup>                | 66.43(6)   | Cu(2)-I(1)-Cu(2) <sup>#1</sup>                | 59.29(10)  |
| I(2)-Cu(1)-Cu(1) <sup>#1</sup>                | 130.07(12) | Cu(1) <sup>#1</sup> -I(1)-Cu(2) <sup>#1</sup> | 51.90(7)   |
| I(3)-Cu(1)-I(1)                               | 112.15(7)  | Cu(1)-I(3)-Cu(2) <sup>#2</sup>                | 110.35(9)  |
| I(2)-Cu(1)-I(1)                               | 105.52(6)  | Cu(1)-I(3)-Cu(1) <sup>#2</sup>                | 58.59(11)  |
| Cu(1) <sup>#1</sup> -Cu(1)-I(1)               | 119.80(11) | Cu(2) <sup>#2</sup> -I(3)-Cu(1) <sup>#2</sup> | 51.78(7)   |
| I(3)-Cu(1)-I(3) <sup>#1</sup>                 | 121.25(7)  | Cu(1)-I(2)-Cu(2)                              | 55.63(8)   |
| I(2)-Cu(1)-I(3) <sup>#1</sup>                 | 102.16(6)  | Cu(1)-Cu(2)-I(1)                              | 176.60(17) |
| Cu(1) <sup>#1</sup> -Cu(1)-I(3) <sup>#1</sup> | 54.82(7)   | Cu(1)-Cu(2)-I(2)                              | 62.01(9)   |
| I(1)-Cu(1)-I(3) <sup>#1</sup>                 | 97.32(6)   | I(1)-Cu(2)-I(2)                               | 116.18(10) |
| I(1) <sup>#2</sup> -Cu(2)-I(2)                | 116.53(7)  | Cu(1)-Cu(2)-Cu(2) <sup>#1</sup>               | 117.18(18) |
| I(1) <sup>#2</sup> -Cu(2)-Cu(2) <sup>#2</sup> | 67.39(6)   | I(1)-Cu(2)-Cu(2) <sup>#1</sup>                | 66.22(9)   |
| I(2)-Cu(2)-Cu(2) <sup>#2</sup>                | 131.10(13) | I(2)-Cu(2)-Cu(2) <sup>#1</sup>                | 130.45(19) |
| I(1) <sup>#2</sup> -Cu(2)-I(3) <sup>#1</sup>  | 112.73(8)  | Cu(1)-Cu(2)-I(3) <sup>#2</sup>                | 66.46(10)  |
| I(2)-Cu(2)-I(3) <sup>#1</sup>                 | 104.35(6)  | I(1)-Cu(2)-I(3) <sup>#2</sup>                 | 112.09(11) |
| Cu(2) <sup>#2</sup> -Cu(2)-I(3) <sup>#1</sup> | 119.08(11) | I(2)-Cu(2)-I(3) <sup>#2</sup>                 | 105.38(9)  |
| I(1) <sup>#2</sup> -Cu(2)-I(1)                | 121.86(7)  | Cu(2) <sup>#1</sup> -Cu(2)-I(3) <sup>#2</sup> | 119.57(16) |
| I(2)-Cu(2)-I(1)                               | 102.19(7)  | Cu(1)-Cu(2)-I(1) <sup>#1</sup>                | 62.68(10)  |
| Cu(2) <sup>#2</sup> -Cu(2)-I(1)               | 54.47(7)   | I(1)-Cu(2)-I(1) <sup>#1</sup>                 | 120.71(10) |
| I(3) <sup>#1</sup> -Cu(2)-I(1)                | 96.12(6)   | I(2)-Cu(2)-I(1) <sup>#1</sup>                 | 102.53(9)  |
| Cu(2) <sup>#2</sup> -I(1)-Cu(1)               | 110.31(6)  | Cu(2) <sup>#1</sup> -Cu(2)-I(1) <sup>#1</sup> | 54.50(10)  |
| Cu(2) <sup>#2</sup> -I(1)-Cu(2)               | 58.14(7)   | I(3) <sup>#2</sup> -Cu(2)-I(1) <sup>#1</sup>  | 97.42(9)   |
| Cu(1)-I(1)-Cu(2)                              | 52.18(5)   | Cu(2)-Cu(1)-I(3)                              | 176.60(18) |
| Cu(2)-I(2)-Cu(1)                              | 55.78(5)   | Cu(2)-Cu(1)-I(2)                              | 62.37(9)   |
| Cu(1)-I(3)-Cu(2) <sup>#1</sup>                | 111.02(6)  | I(3)-Cu(1)-I(2)                               | 116.80(11) |
| Cu(1)-I(3)-Cu(1) <sup>#1</sup>                | 58.75(7)   | Cu(2)-Cu(1)-Cu(1) <sup>#2</sup>               | 116.00(18) |
| Cu(2) <sup>#1</sup> -I(3)-Cu(1) <sup>#1</sup> | 52.27(5)   | I(3)-Cu(1)-Cu(1) <sup>#2</sup>                | 67.16(9)   |
|                                               |            | I(2)-Cu(1)-Cu(1) <sup>#2</sup>                | 131.5(2)   |
|                                               |            | Cu(2)-Cu(1)-I(1) <sup>#1</sup>                | 65.41(10)  |
|                                               |            | I(3)-Cu(1)-I(1) <sup>#1</sup>                 | 112.24(12) |
|                                               |            | I(2)-Cu(1)-I(1) <sup>#1</sup>                 | 104.54(9)  |
|                                               |            | Cu(1) <sup>#2</sup> -Cu(1)-I(1) <sup>#1</sup> | 118.63(16) |
|                                               |            | Cu(2)-Cu(1)-I(3) <sup>#2</sup>                | 61.76(10)  |
|                                               |            | I(3)-Cu(1)-I(3) <sup>#2</sup>                 | 121.41(11) |
|                                               |            | I(2)-Cu(1)-I(3) <sup>#2</sup>                 | 102.54(10) |
|                                               |            | Cu(1) <sup>#2</sup> -Cu(1)-I(3) <sup>#2</sup> | 54.26(10)  |
|                                               |            | I(1) <sup>#1</sup> -Cu(1)-I(3) <sup>#2</sup>  | 96.34(8)   |

Symmetry codes:

T = 223 K: #1 = -x+2, -y, -z+1; #2 = -x+1, -y, -z+1

T = 298 K: #1 = -x+2, -y+1, -z+2; #2 = -x+1, -y+1, -z+2



Continue to Table S4

| T = 360 K                                     |            | T = 400 K                                      |            |
|-----------------------------------------------|------------|------------------------------------------------|------------|
| Atoms                                         | Angle / °  | Atoms                                          | Angle / °  |
| I(3)-Cu(1)-I(2)                               | 117.73(9)  | Cu(2)-I(1)-Cu(1)                               | 111.25(8)  |
| I(3)-Cu(1)-Cu(1) <sup>#1</sup>                | 66.88(8)   | Cu(2)-I(1)-Cu(2) <sup>#1</sup>                 | 59.85(9)   |
| I(2)-Cu(1)-Cu(1) <sup>#1</sup>                | 132.33(17) | Cu(1)-I(1)-Cu(2) <sup>#1</sup>                 | 51.41(6)   |
| I(3)-Cu(1)-I(1)                               | 111.20(10) | Cu(1)-I(2)-Cu(2) <sup>#1</sup>                 | 55.74(7)   |
| I(2)-Cu(1)-I(1)                               | 104.96(8)  | Cu(1)-I(3)-Cu(2) <sup>#2</sup>                 | 110.93(8)  |
| Cu(1) <sup>#1</sup> -Cu(1)-I(1)               | 117.43(14) | Cu(1)-I(3)-Cu(1) <sup>#3</sup>                 | 59.61(9)   |
| I(3)-Cu(1)-I(3) <sup>#1</sup>                 | 120.79(9)  | Cu(2) <sup>#2</sup> -I(3)-Cu(1) <sup>#3</sup>  | 51.36(6)   |
| I(2)-Cu(1)-I(3) <sup>#1</sup>                 | 102.72(9)  | Cu(2) <sup>#1</sup> -Cu(1)-I(3)                | 176.14(15) |
| Cu(1) <sup>#1</sup> -Cu(1)-I(3) <sup>#1</sup> | 53.91(9)   | Cu(2) <sup>#1</sup> -Cu(1)-I(2)                | 62.32(7)   |
| I(1)-Cu(1)-I(3) <sup>#1</sup>                 | 96.46(7)   | I(3)-Cu(1)-I(2)                                | 117.74(9)  |
| I(1) <sup>#2</sup> -Cu(2)-I(2)                | 117.24(10) | Cu(2) <sup>#1</sup> -Cu(1)-Cu(1) <sup>#3</sup> | 116.33(15) |
| I(1) <sup>#2</sup> -Cu(2)-Cu(2) <sup>#2</sup> | 66.30(8)   | I(3)-Cu(1)-Cu(1) <sup>#3</sup>                 | 66.73(7)   |
| I(2)-Cu(2)-Cu(2) <sup>#2</sup>                | 132.35(16) | I(2)-Cu(1)-Cu(1) <sup>#3</sup>                 | 132.43(17) |
| I(1) <sup>#2</sup> -Cu(2)-I(3) <sup>#1</sup>  | 111.37(10) | Cu(2) <sup>#1</sup> -Cu(1)-I(1)                | 65.46(8)   |
| I(2)-Cu(2)-I(3) <sup>#1</sup>                 | 104.74(8)  | I(3)-Cu(1)-I(1)                                | 111.26(10) |
| Cu(2) <sup>#2</sup> -Cu(2)-I(3) <sup>#1</sup> | 118.16(14) | I(2)-Cu(1)-I(1)                                | 105.12(8)  |
| I(1) <sup>#2</sup> -Cu(2)-I(1)                | 120.38(9)  | Cu(1) <sup>#3</sup> -Cu(1)-I(1)                | 117.18(13) |
| I(2)-Cu(2)-I(1)                               | 103.30(8)  | Cu(2) <sup>#1</sup> -Cu(1)-I(3) <sup>#3</sup>  | 62.72(8)   |
| Cu(2) <sup>#2</sup> -Cu(2)-I(1)               | 54.07(9)   | I(3)-Cu(1)-I(3) <sup>#3</sup>                  | 120.39(9)  |
| I(3) <sup>#1</sup> -Cu(2)-I(1)                | 97.03(8)   | I(2)-Cu(1)-I(3) <sup>#3</sup>                  | 103.03(9)  |
| Cu(2) <sup>#2</sup> -I(1)-Cu(1)               | 111.23(8)  | Cu(1) <sup>#3</sup> -Cu(1)-I(3) <sup>#3</sup>  | 53.65(9)   |
| Cu(2) <sup>#2</sup> -I(1)-Cu(2)               | 59.62(9)   | I(1)-Cu(1)-I(3) <sup>#3</sup>                  | 96.37(7)   |
| Cu(1)-I(1)-Cu(2)                              | 51.62(6)   | Cu(1) <sup>#1</sup> -Cu(2)-I(1)                | 176.42(15) |
| Cu(1)-I(2)-Cu(2)                              | 55.70(7)   | Cu(1) <sup>#1</sup> -Cu(2)-I(2) <sup>#1</sup>  | 61.94(7)   |
| Cu(1)-I(3)-Cu(2) <sup>#1</sup>                | 110.69(8)  | I(1)-Cu(2)-I(2) <sup>#1</sup>                  | 117.33(9)  |
| Cu(1)-I(3)-Cu(1) <sup>#1</sup>                | 59.21(9)   | Cu(1) <sup>#1</sup> -Cu(2)-Cu(2) <sup>#1</sup> | 116.90(15) |
| Cu(2) <sup>#1</sup> -I(3)-Cu(1) <sup>#1</sup> | 51.52(6)   | I(1)-Cu(2)-Cu(2) <sup>#1</sup>                 | 66.35(7)   |
| I(3)-Cu(1)-I(2)                               | 117.73(9)  | I(2) <sup>#1</sup> -Cu(2)-Cu(2) <sup>#1</sup>  | 132.28(16) |
| I(3)-Cu(1)-Cu(1) <sup>#1</sup>                | 66.88(8)   | Cu(1) <sup>#1</sup> -Cu(2)-I(3) <sup>#4</sup>  | 65.92(8)   |
| I(2)-Cu(1)-Cu(1) <sup>#1</sup>                | 132.33(17) | I(1)-Cu(2)-I(3) <sup>#4</sup>                  | 111.51(9)  |
| I(3)-Cu(1)-I(1)                               | 111.20(10) | I(2) <sup>#1</sup> -Cu(2)-I(3) <sup>#4</sup>   | 104.88(8)  |
| I(2)-Cu(1)-I(1)                               | 104.96(8)  | Cu(2) <sup>#1</sup> -Cu(2)-I(3) <sup>#4</sup>  | 117.92(13) |
| Cu(1) <sup>#1</sup> -Cu(1)-I(1)               | 117.43(14) | Cu(1) <sup>#1</sup> -Cu(2)-I(1) <sup>#1</sup>  | 63.12(9)   |
| I(3)-Cu(1)-I(3) <sup>#1</sup>                 | 120.79(9)  | I(1)-Cu(2)-I(1) <sup>#1</sup>                  | 120.15(9)  |
| I(2)-Cu(1)-I(3) <sup>#1</sup>                 | 102.72(9)  | I(2) <sup>#1</sup> -Cu(2)-I(1) <sup>#1</sup>   | 103.34(8)  |
| Cu(1) <sup>#1</sup> -Cu(1)-I(3) <sup>#1</sup> | 53.91(9)   | Cu(2) <sup>#1</sup> -Cu(2)-I(1) <sup>#1</sup>  | 53.80(9)   |
| I(1)-Cu(1)-I(3) <sup>#1</sup>                 | 96.46(7)   | I(3) <sup>#4</sup> -Cu(2)-I(1) <sup>#1</sup>   | 96.84(7)   |

Symmetry codes:

T = 360 K: #1 = -x+1, -y+1, -z+1; #2 = -x+2, -y+1, -z+1

T = 400 K: #1 = -x+2, -y+1, -z+1; #2 = x-1, y, z; #3 = -x+1, -y+1, -z+1; #4 = x+1, y, z

Table S5: Bond angles ( $^{\circ}$ ) in  $C_5H_{14}N^+$  cation in crystal structures of **1** at 223, 298, 360 and 400 K

| T = 223 K      |                    | T = 298 K      |                    |
|----------------|--------------------|----------------|--------------------|
| Atoms          | Angle / $^{\circ}$ | Atoms          | Angle / $^{\circ}$ |
| C(4)-N(1)-C(3) | 118.7(18)          | C(5)-N(1)-C(1) | 110(2)             |
| C(4)-N(1)-C(1) | 118.5(15)          | C(5)-N(1)-C(2) | 117(2)             |
| C(3)-N(1)-C(1) | 112.6(12)          | C(1)-N(1)-C(2) | 115(2)             |
| C(4)-N(1)-C(2) | 94(2)              | C(5)-N(1)-C(3) | 99.1(15)           |
| C(3)-N(1)-C(2) | 102.9(19)          | C(1)-N(1)-C(3) | 109(3)             |
| C(1)-N(1)-C(2) | 105.0(15)          | C(2)-N(1)-C(3) | 106(2)             |
| N(1)-C(4)-C(5) | 98(2)              | N(1)-C(5)-C(4) | 100(3)             |

Symmetry codes:

T = 223 K: #1 =  $-x+2, -y, -z+1$ ; #2 =  $-x+1, -y, -z+1$

T = 298 K: #1 =  $-x+2, -y+1, -z+2$ ; #2 =  $-x+1, -y+1, -z+2$

Continue to Table S5

| T = 360 K      |                    | T = 400 K      |                    |
|----------------|--------------------|----------------|--------------------|
| Atoms          | Angle / $^{\circ}$ | Atoms          | Angle / $^{\circ}$ |
| C(3)-N(1)-C(1) | 118(3)             | C(3)-N(1)-C(5) | 119(3)             |
| C(3)-N(1)-C(4) | 119(3)             | C(3)-N(1)-C(1) | 115(2)             |
| C(1)-N(1)-C(4) | 116(3)             | C(5)-N(1)-C(1) | 121(3)             |
| C(3)-N(1)-C(2) | 98(2)              | C(3)-N(1)-C(2) | 94(3)              |
| C(1)-N(1)-C(2) | 107(3)             | C(5)-N(1)-C(2) | 91.9(10)           |
| C(4)-N(1)-C(2) | 91.7(14)           | C(1)-N(1)-C(2) | 106(2)             |
| N(1)-C(4)-C(5) | 95(2)              | N(1)-C(5)-C(4) | 89(2)              |

Symmetry codes:

T = 360 K: #1 =  $-x+1, -y+1, -z+1$ ; #2 =  $-x+2, -y+1, -z+1$

T = 400 K: #1 =  $-x+2, -y+1, -z+1$ ; #2 =  $x-1, y, z$ ; #3 =  $-x+1, -y+1, -z+1$ ; #4 =  $x+1, y, z$

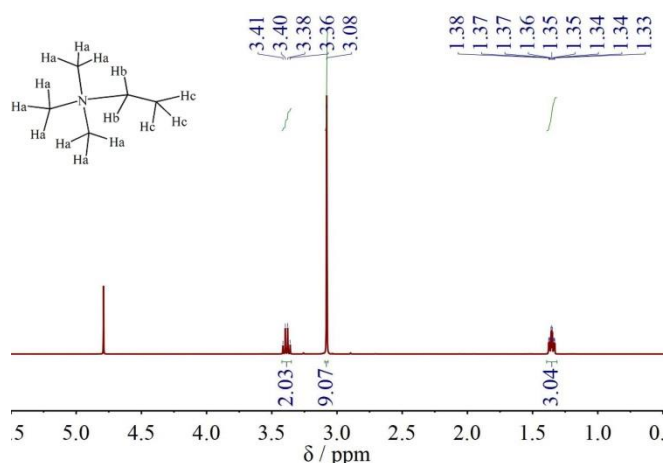

Fig. S1: The molecular structure of  $\text{Me}_3\text{EtN}^+$  and  $^1\text{H}$  NMR of  $[\text{Me}_3\text{EtN}]\text{Br}$  (400 MHz,  $\text{D}_2\text{O}$ ): 1.23–1.31 (3H,  $\text{CH}_3$ ), 2.96–3.03 (9H, 3  $\text{CH}_3$ ), 3.26–3.34 (2H,  $\text{CH}_2$ ), 4.96–4.72 ( $\text{D}_2\text{O}$ ).

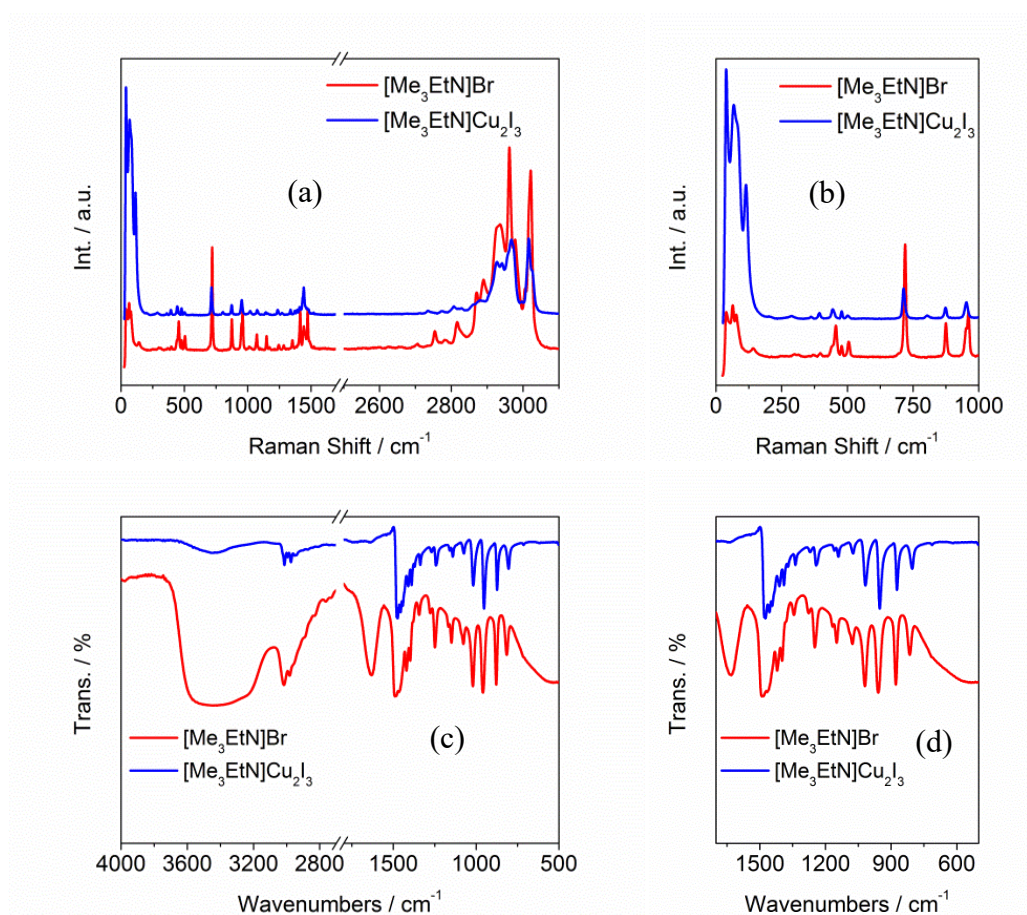

Fig. S2: Raman spectra of  $[\text{Me}_3\text{EtN}]\text{Br}$  and **1** in the range of (a) 20–3100  $\text{cm}^{-1}$  and (b) 20–1000  $\text{cm}^{-1}$ . IR spectra of  $[\text{Me}_3\text{EtN}]\text{Br}$  and **1** in the range of (c) 4000–500  $\text{cm}^{-1}$  and (d) 1700–500  $\text{cm}^{-1}$ .

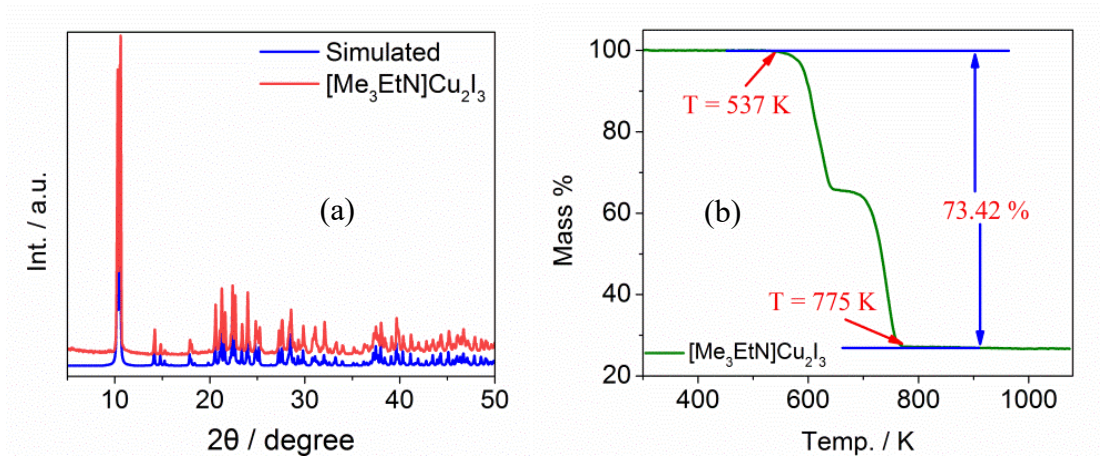

Fig. S3: (a) Experimental and simulated PXRD profiles at ambient condition and (b) TG plot of **1**, demonstrating that this hybrid is thermally stable below ca. 537 K, and then takes place two-step thermal decomposition, the weight loss of 36.0% between 537 and 699 K is in good agreement with the calculated value of 36.1%, corresponding to release completely Me<sub>3</sub>EtI. The next weight loss is 36.75%, occurred between 699 and 776 K, and the detail is not clear for this process of decomposition at present stage.

Interestingly, **1** can be melted at ca. 513 K (Fig. S16), moreover, the melted liquid was also recrystallized when cooled down to ambient condition, and the recrystallized sample showed the same PXRD pattern as the pristine sample of **1**.

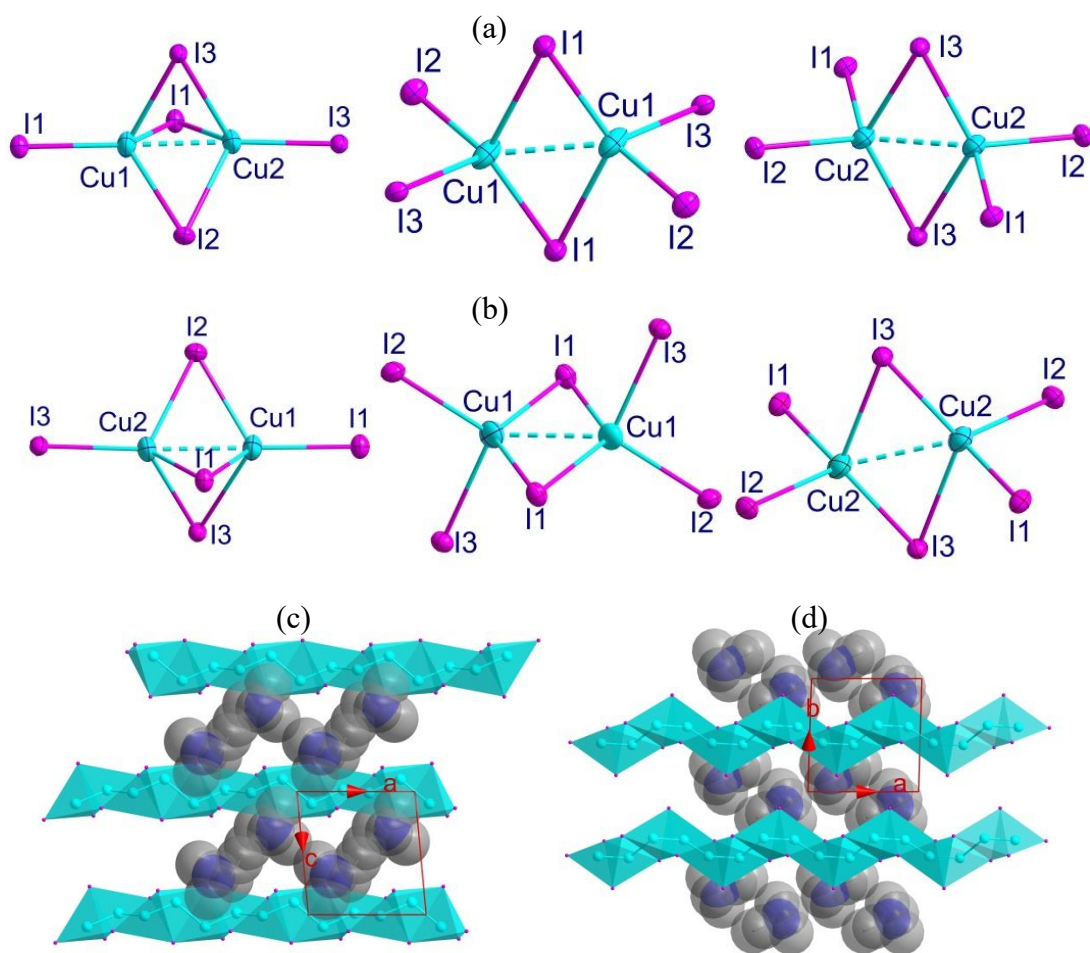

Fig. S4: Three different tetrahedral dimers at (a) 223 K, (b) 298 K and (c, d) packing diagrams viewed along *b*- and *c*-axis in the crystal structure of **1** at 223 K.

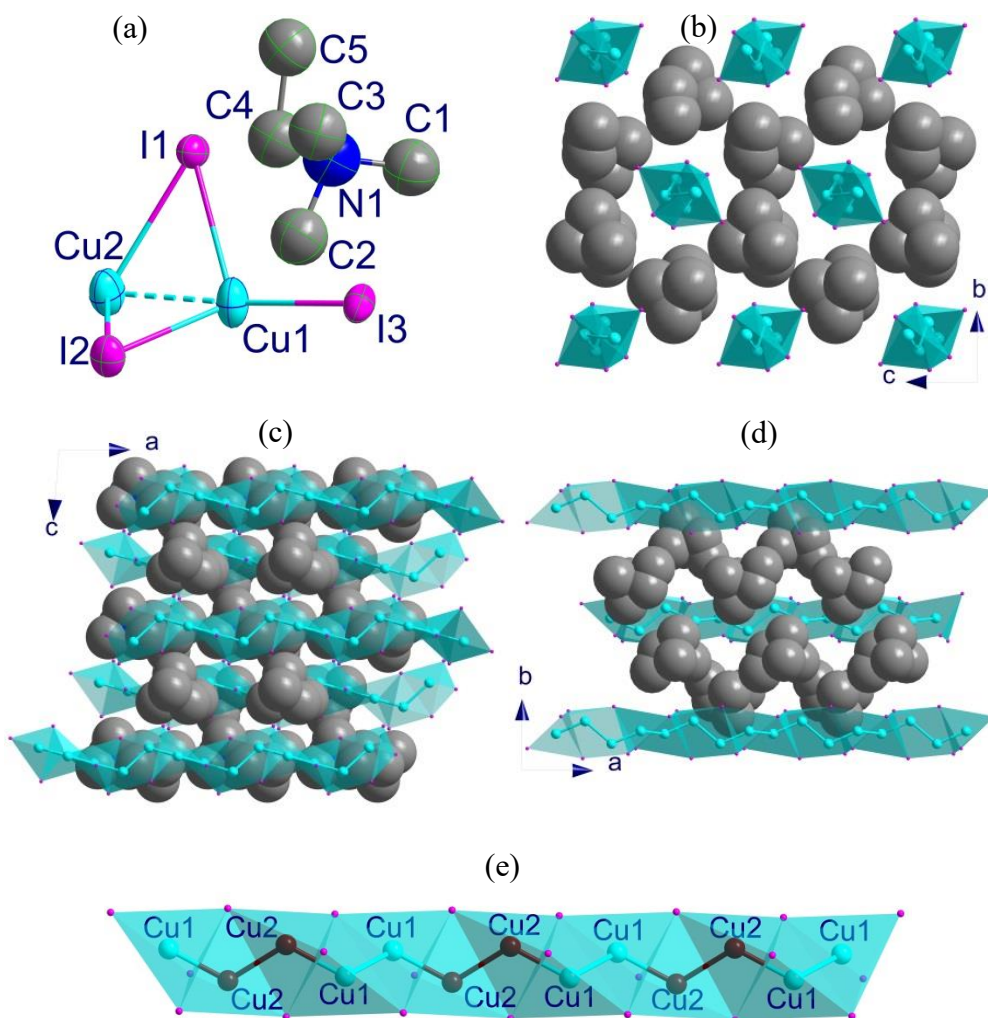

Fig. S5. (a) ORTEP view of **1** with thermal ellipsoid plot drawn at 20% probability level, (b–c) packing diagrams of **1** viewed along *a*-, *b*- and *c*-axes, respectively, (e)  $\{\text{Cu}_2\text{I}_3\}_\infty$  chain in **1** at 360 K.

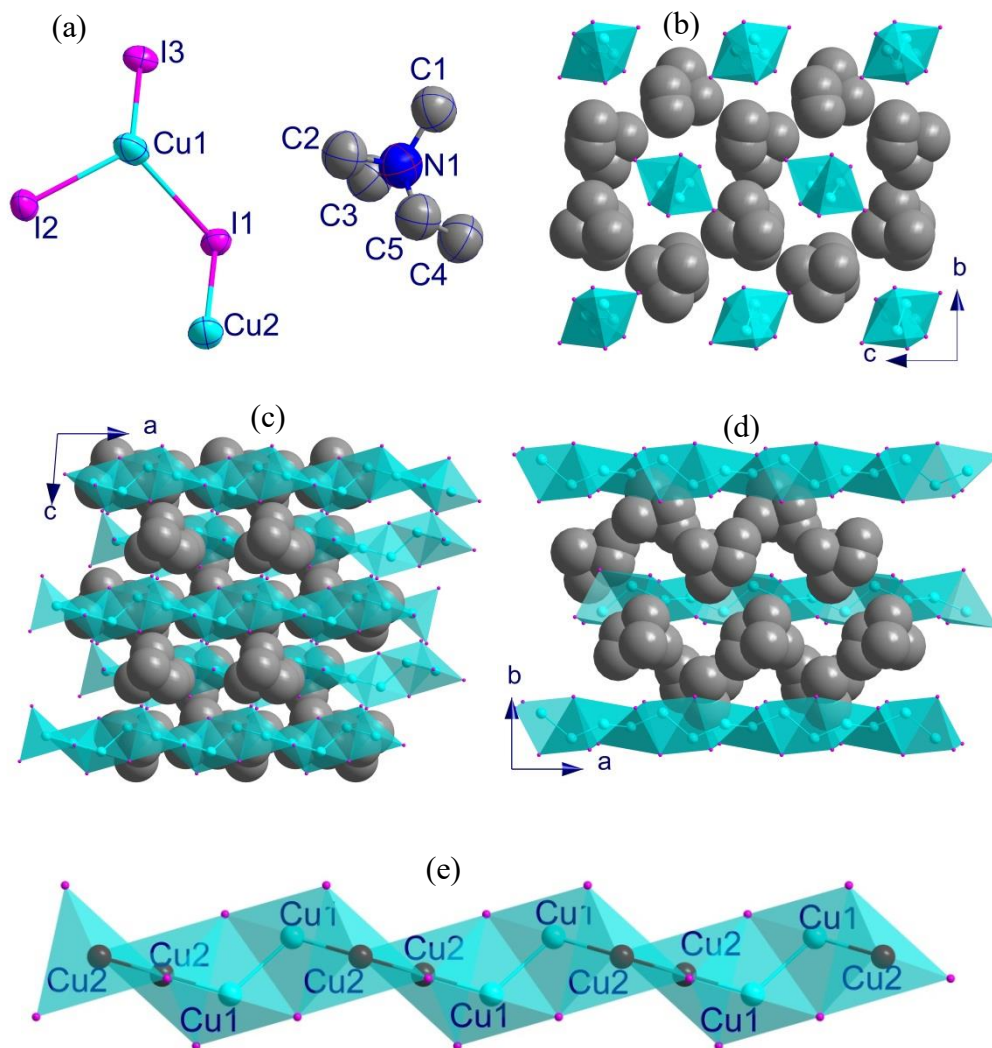

Fig. S6: (a) ORTEP view of **1** with thermal ellipsoid plot drawn at 20% probability level, (b–c) packing diagrams of **1** viewed along *a*-, *b*- and *c*-axes, respectively, (e)  $\{\text{Cu}_2\text{I}_3^-\}_\infty$  chain in **1** at 400 K.

Cu1...Cu1 dimer at 223 K

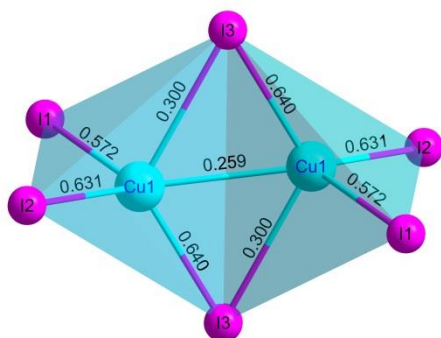

Cu1...Cu1 dimer at 298 K

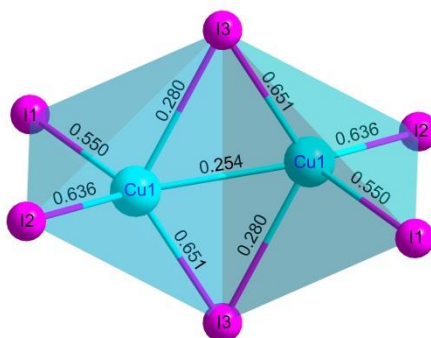

Cu1...Cu1 dimer at 360 K

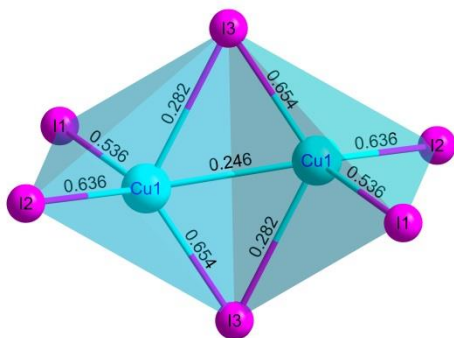

Cu1...Cu1 dimer at 400 K

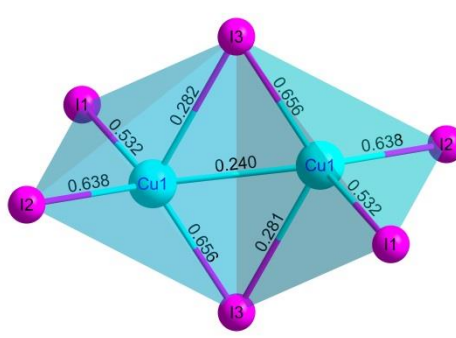

Cu1...Cu2 dimer at 223 K

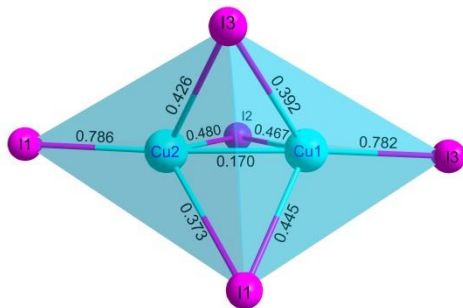

Cu1...Cu2 dimer at 298 K

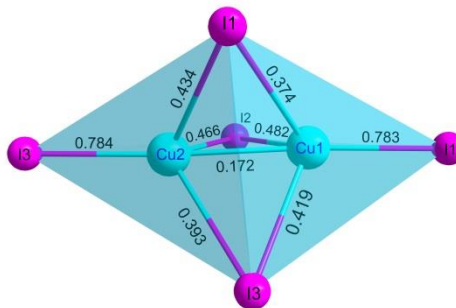

Cu1...Cu2 dimer at 360 K

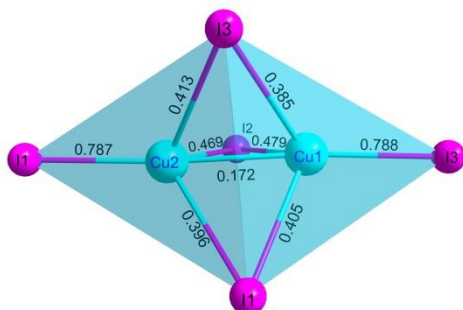

Cu1...Cu2 dimer at 400 K

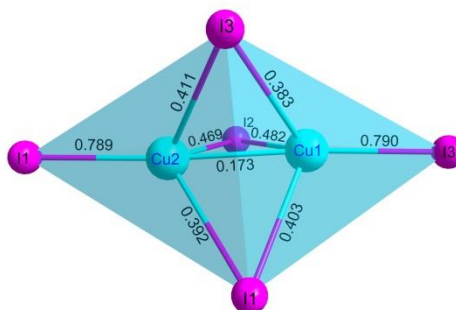



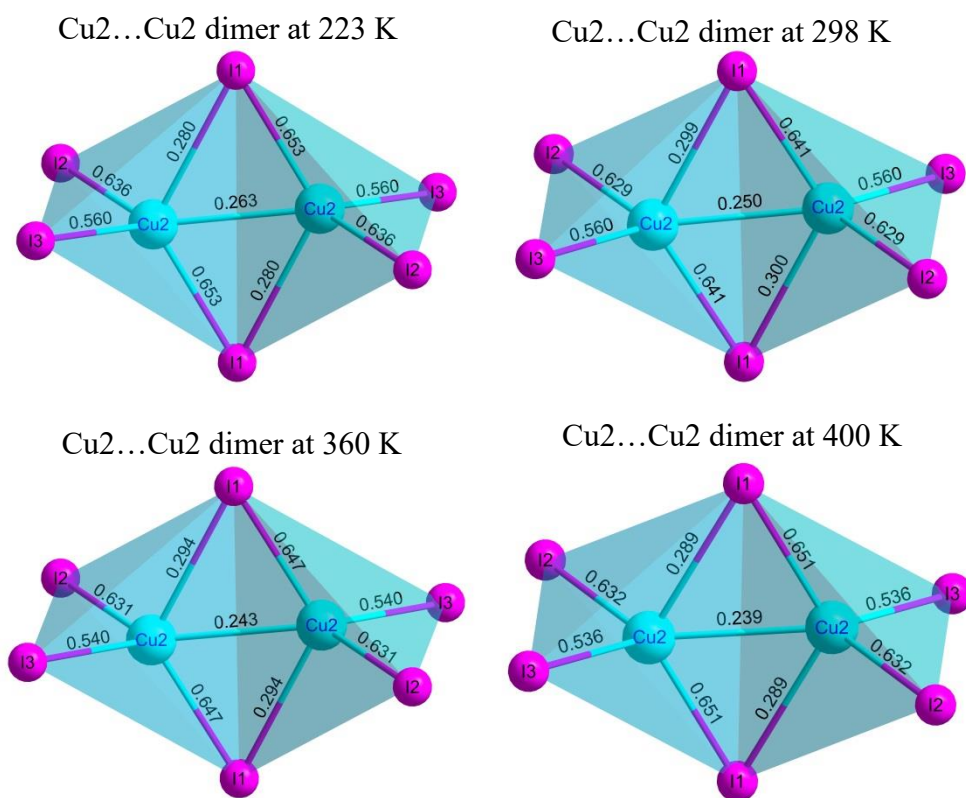

Fig. S7: Bond order analysis in a dimer of **1** with two face-sharing tetrahedra [Cu<sub>2</sub>I<sub>5</sub>]<sup>3-</sup> and two edge-sharing tetrahedra [Cu<sub>2</sub>I<sub>6</sub>]<sup>4-</sup> at 223, 298, 360 and 400 K.

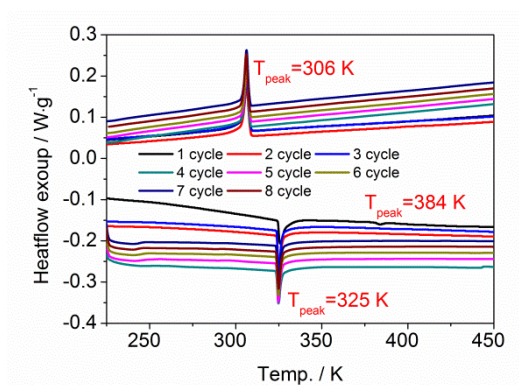

Fig. S8: DSC plots of **1**, in which the DSC measurements of **1** were carried out for three heating-cooling cycles (corresponding to the curves 1–3 cycles), and three months later, the DSC measurements were further performed for the same sample again, and the plots of five heating-cooling cycles are presented as the 4–cycle to 8–cycle, and these curves are almost the same as 2-cycle and 3-cycle.

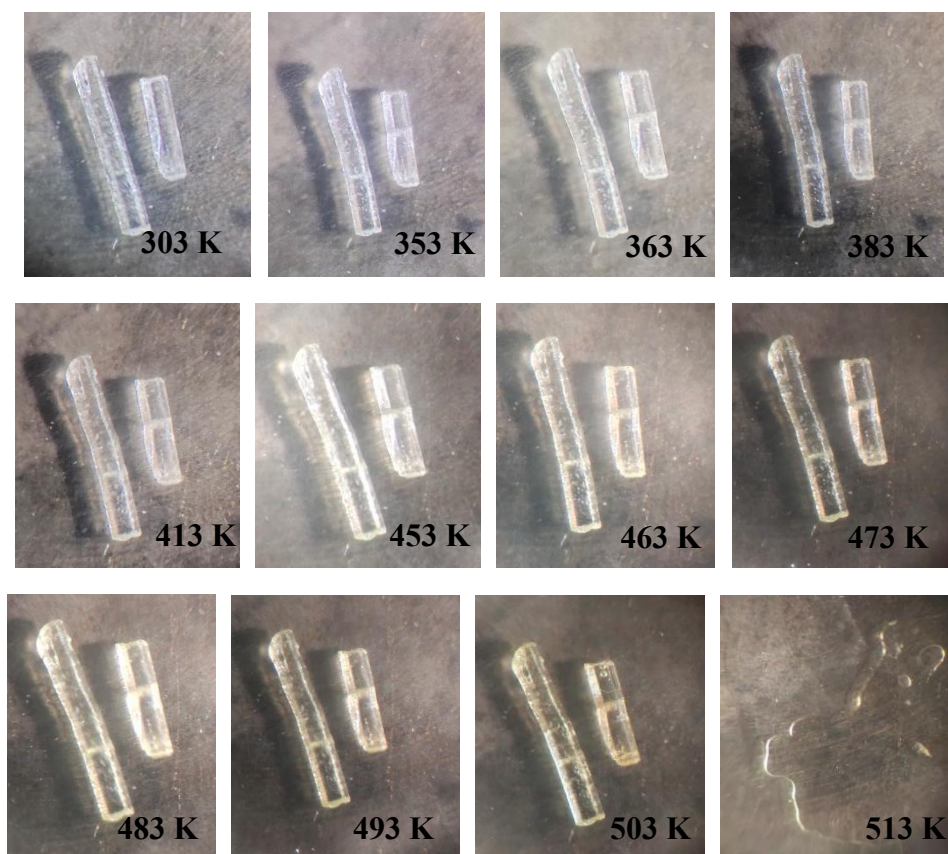

Fig. S9: Photos of crystal of **1** at 303–353 K (almost colorless), 363–463 K (light-yellow), 473–503 K (deeper light-yellow) and 513 K (melted). The pictures were taken by a Leica DMRX polarizing optical microscope equipped with an LINKAM LTS350 cool and hot stage.

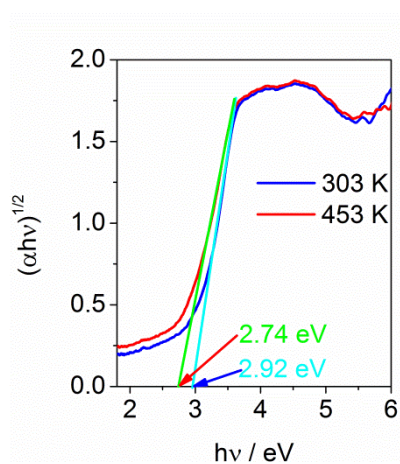

Fig. S10: Tauc plots of **1** at 303 and 453 K.

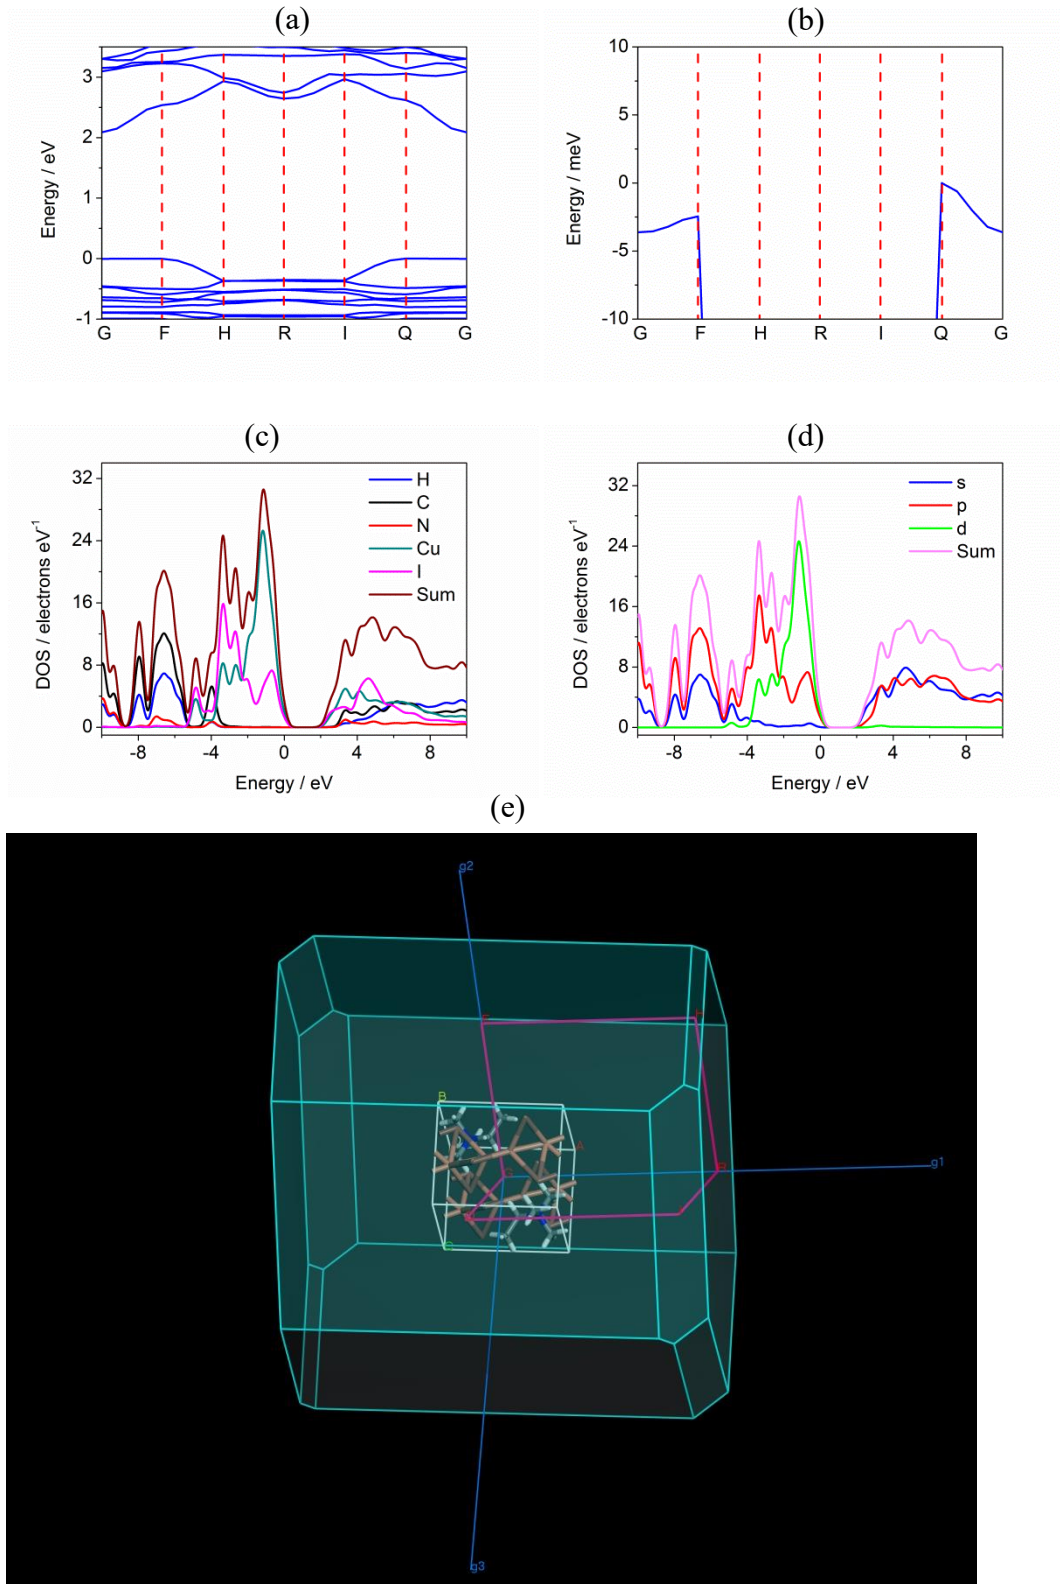

Fig. S11: (a, b) Energy band structures of **1** at 223 K. (c) Local density of states (LDOS), (d) projected density of states (PDOS) and (e) Brillouin zone in **1** at 223 K.

The bands exhibit a sharp dispersion along  $F \rightarrow H$  and  $I \rightarrow Q$  directions while a flat dispersion along other directions (Fig. S9e), demonstrating that there are stronger

orbital interactions along  $F \rightarrow H$  and  $I \rightarrow Q$  directions and weaker orbital interactions along  $G \rightarrow F$ ,  $G \rightarrow Q$ ,  $H \rightarrow R$  and  $R \rightarrow I$  directions. As shown in Fig. 4c, 4d and Fig. S9e, the directions  $F \rightarrow H$  and  $I \rightarrow Q$  are roughly parallel to the direction of  $\{\text{Cu}_2\text{I}_3^-\}_\infty$  tetrahedral chains, and the directions  $G \rightarrow F$ ,  $G \rightarrow Q$ ,  $H \rightarrow R$  and  $R \rightarrow I$  are approximately perpendicular to the  $\{\text{Cu}_2\text{I}_3^-\}_\infty$  tetrahedral chains, implying that there are stronger orbital interactions within  $\{\text{Cu}_2\text{I}_3^-\}_\infty$  tetrahedral chains, whereas weaker intermolecular interactions between cations and  $\{\text{Cu}_2\text{I}_3^-\}_\infty$  tetrahedral chains. This conclusion consists with the crystal structure analysis.

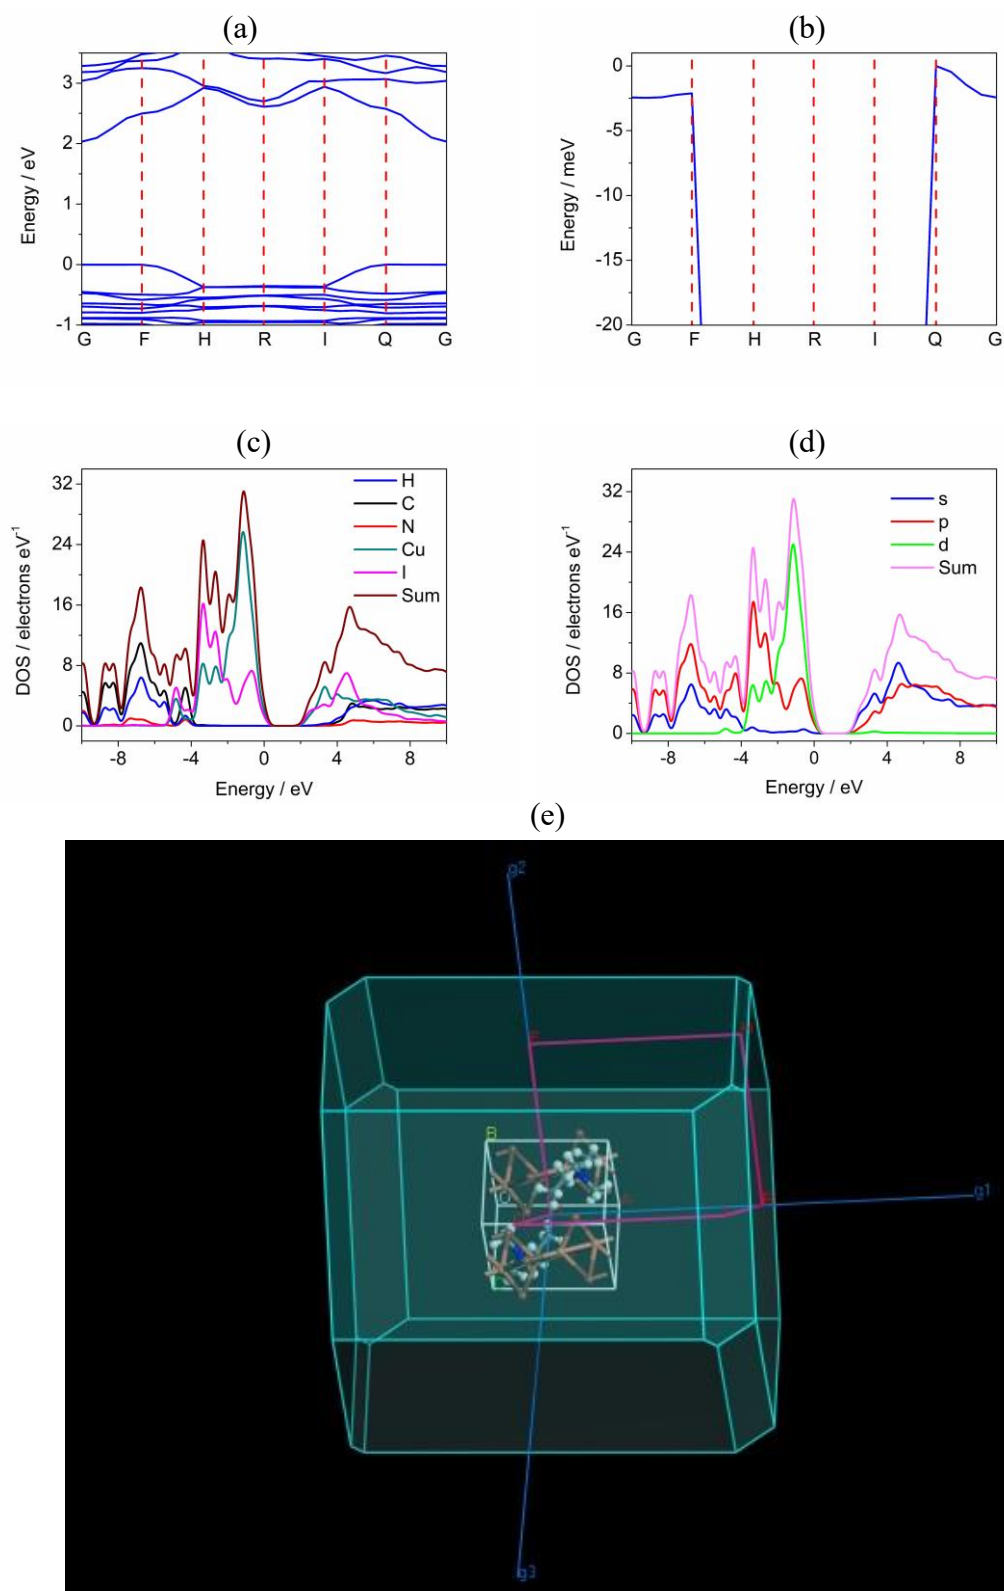

Fig. S12: (a, b) Energy band structures of **1** at 298 K. (c) Local density of states (LDOS), (d) projected density of states (PDOS) and (e) Brillouin zone in **1** at 298 K.

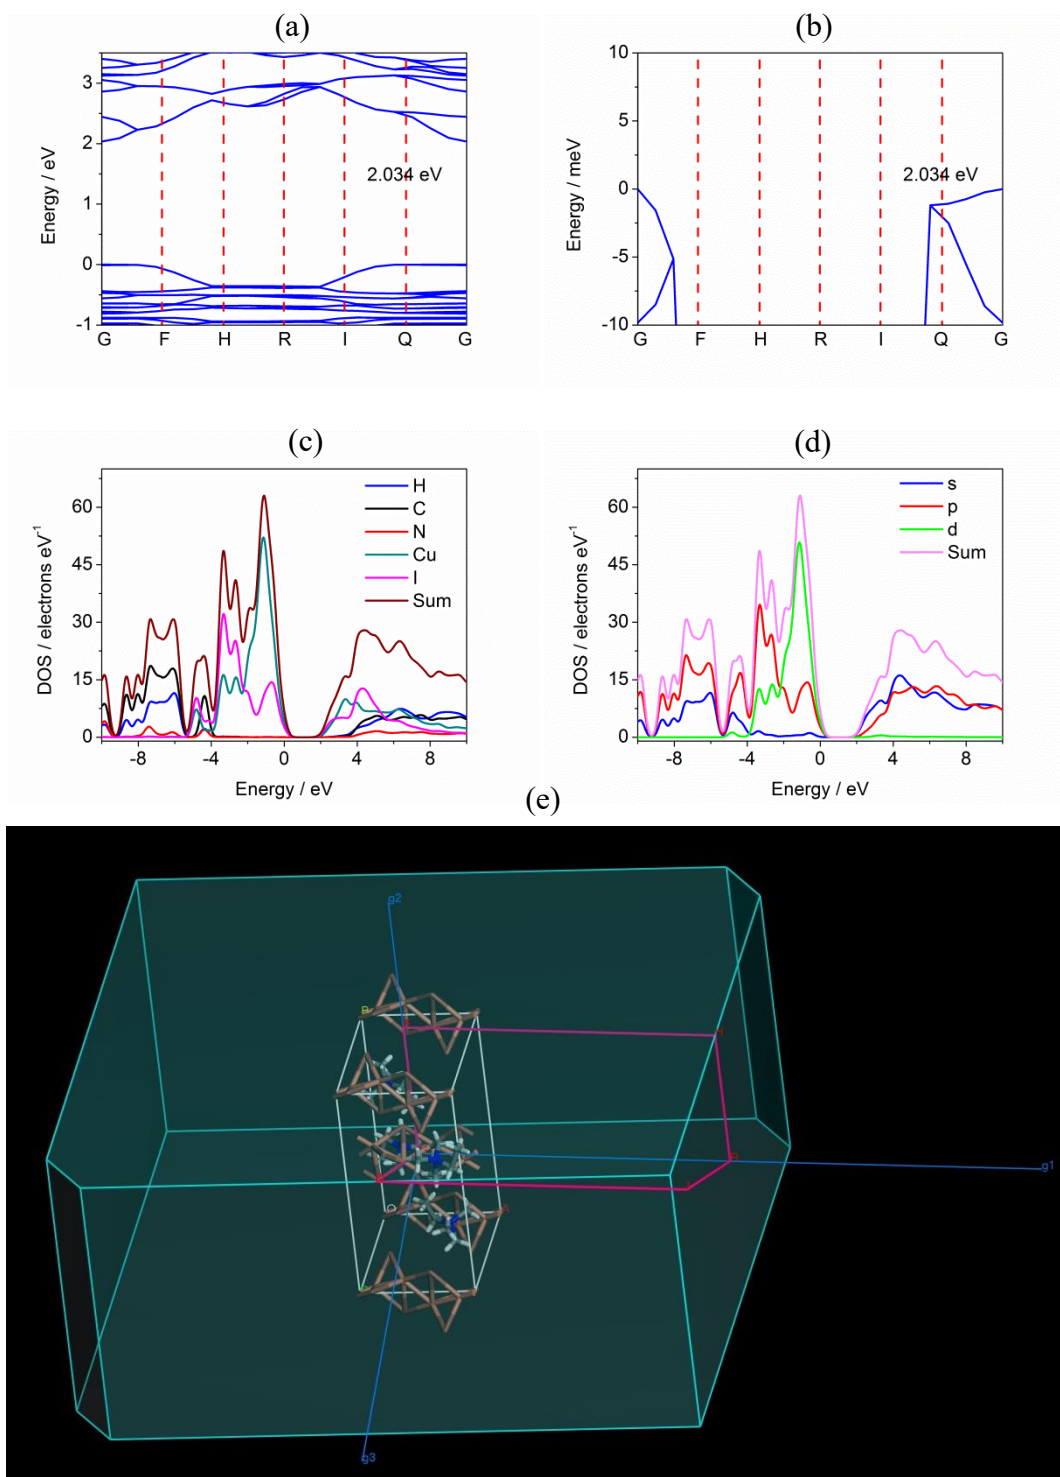

Fig. S13: (a, b) Energy band structures of **1** at 360 K. (c) Local density of states (LDOS), (d) projected density of states (PDOS) and (e) Brillouin zone in **1** at 360 K.

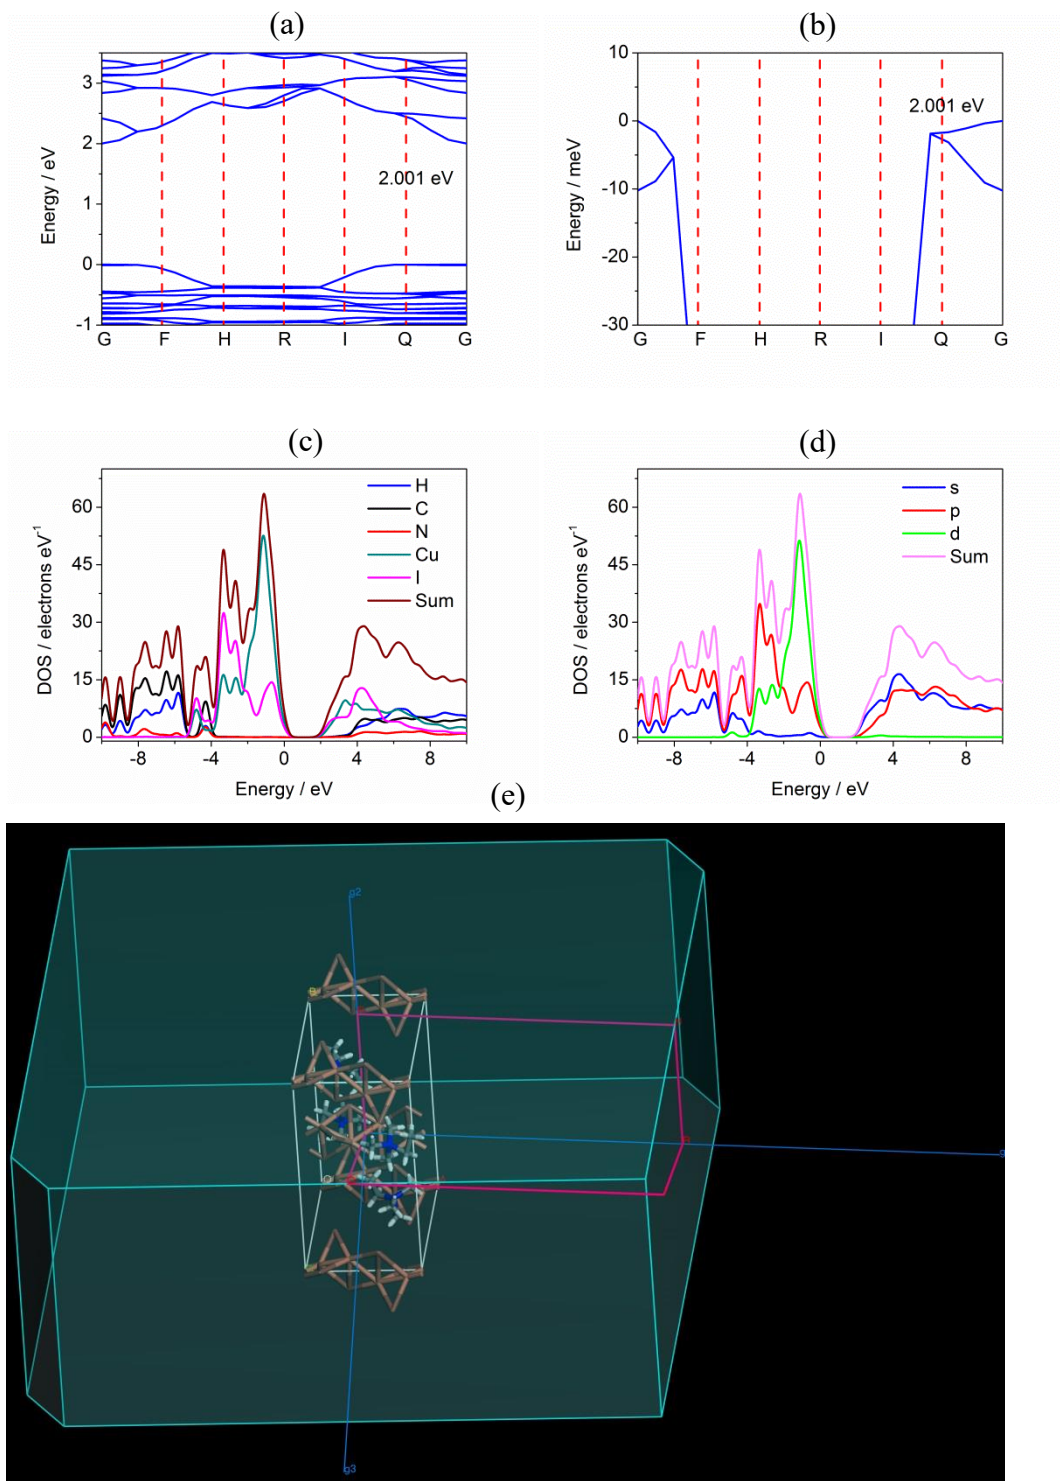

Fig. S14: (a, b) Energy band structures of **1** at 400 K. (c) Local density of states (LDOS), (d) projected density of states (PDOS) and (e) Brillouin zone in **1** at 400 K.

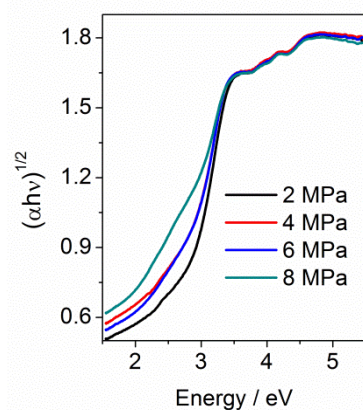

Fig. S14: Tauc plots of **1** transformed from solid diffuse UV-visible spectra under different pressures at room temperature.

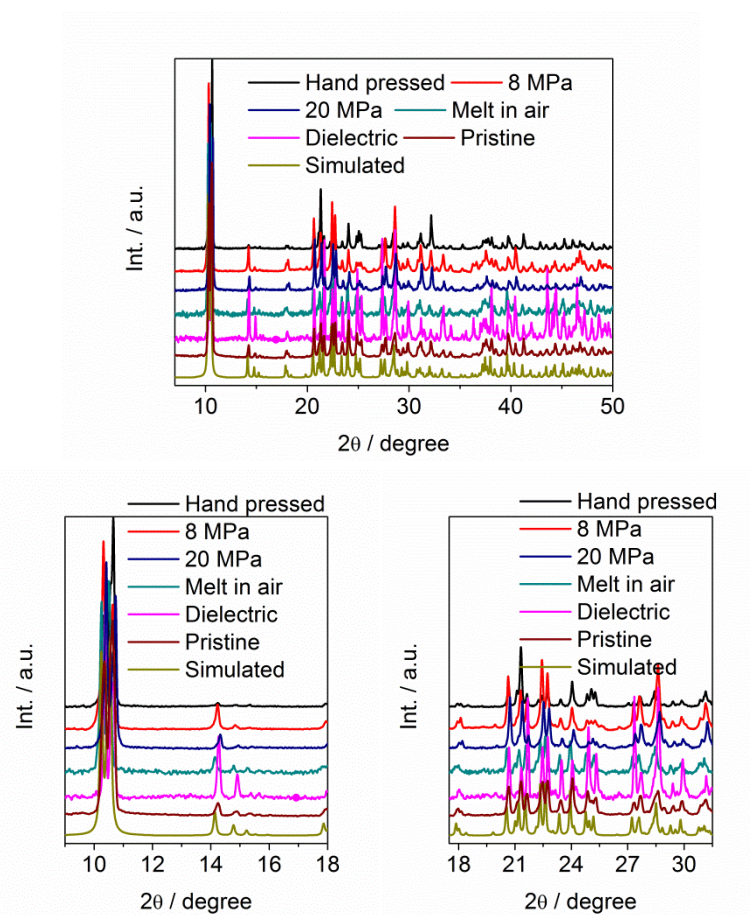

Fig. S15: PXRD patterns of **1** in which the samples were treated at different conditions in different  $2\theta$  regimes.



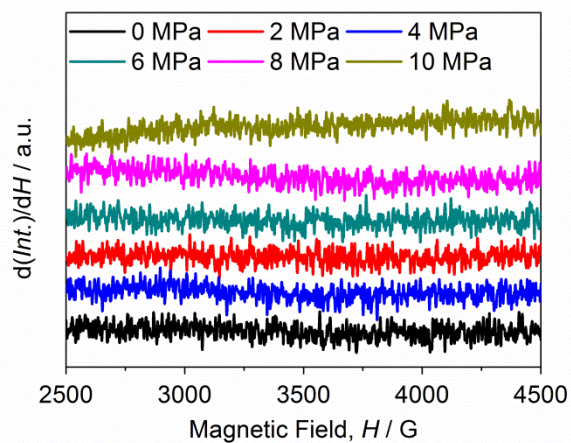

Fig. S16: EPR spectra of **1** where the samples were treated under different pressures recorded at room temperature.

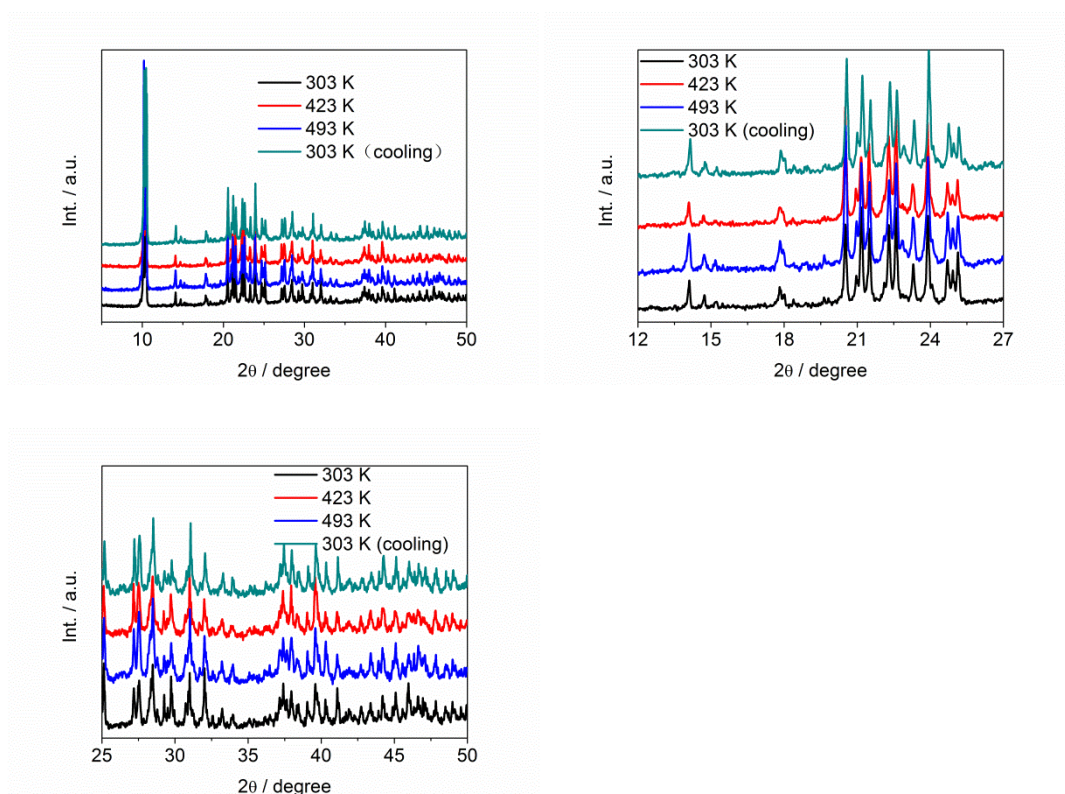

Fig. S17: Variable-temperature PXRD patterns of **1** in different  $2\theta$  ranges at 303 K (pristine sample), 423 and 493 K, 303 K (heated and cooled down).
